# Supplementary material for: Mitotic gene conversion can be as important as meiotic conversion in driving genetic variability in plants and other species without early germline segregation
Source: PLOS journal article supplement (doi:10.1371/journal.pbio.3001164), 2021-03-22
Supplement: S2 (10.1371/journal.pbio.3001164.s002) [file journal.pbio.3001164.s002]

**A**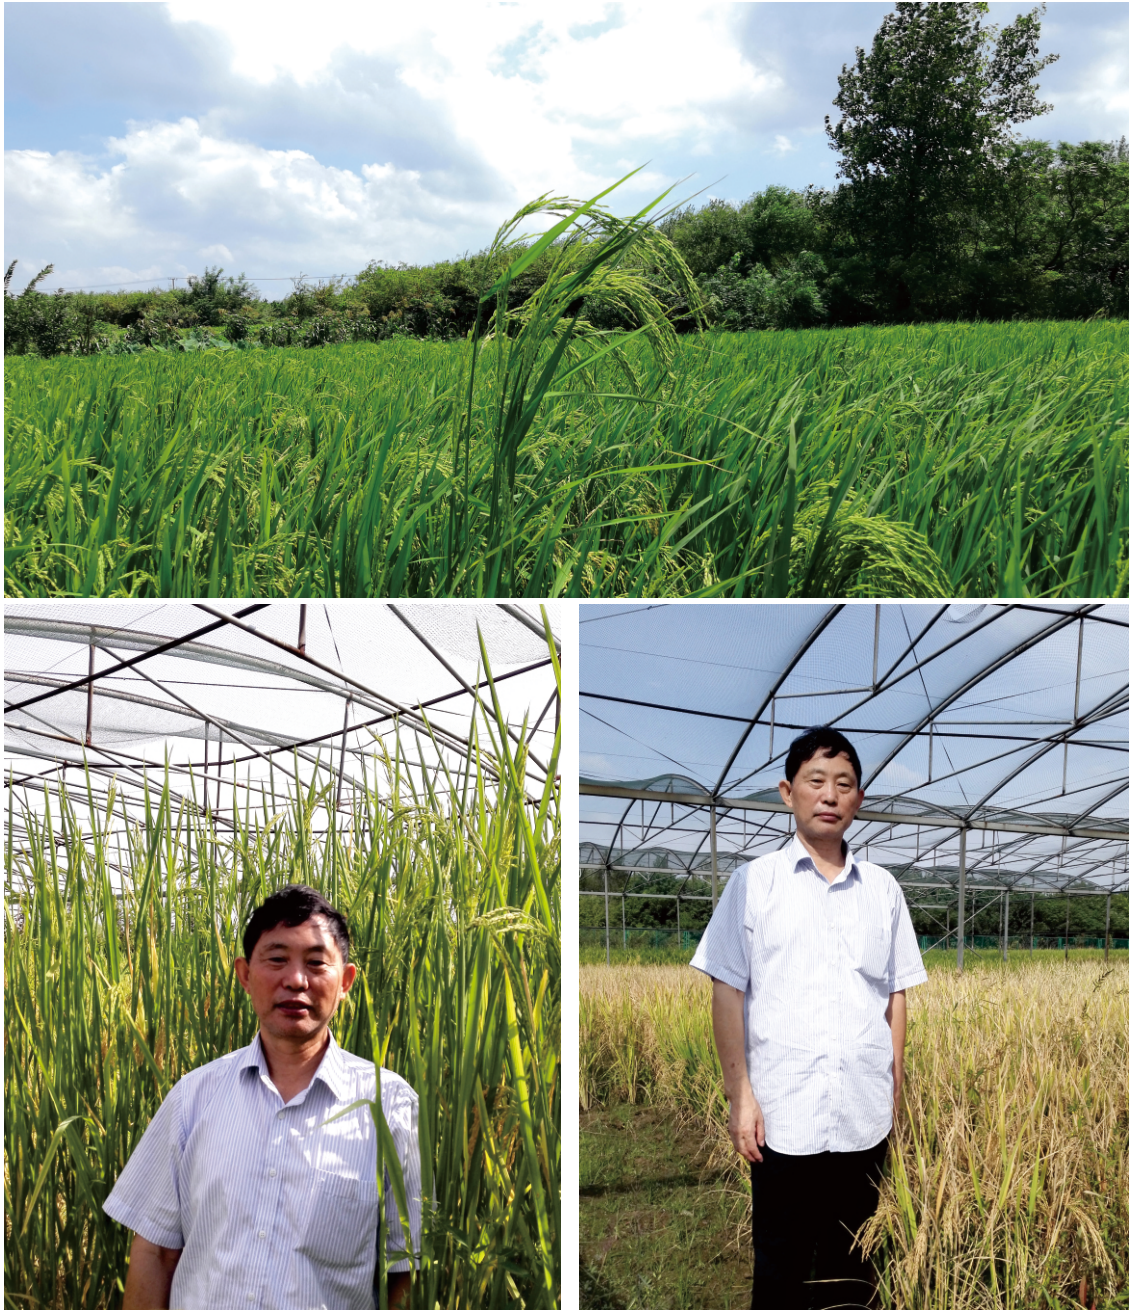**B**

| Hybrid variety       | Symbol | Female parent | <i>SD1</i> allele                    | Male parent | <i>SD1</i> allele                     | Samples |
|----------------------|--------|---------------|--------------------------------------|-------------|---------------------------------------|---------|
| Liangyoupei9         | LYP9   | PA64s*        | <i>p<sup>del</sup>p<sup>wt</sup></i> | 93-11       | <i>N<sup>wt</sup>N<sup>stop</sup></i> | 26      |
| Longliangyou1353     | LLY    | Longke638s    | <i>p<sup>del</sup>p<sup>wt</sup></i> | R1353       | <i>N<sup>wt</sup>N<sup>stop</sup></i> | 4       |
| C-Liangyou -huazhan  | CLYH   | C815s         | <i>p<sup>del</sup>p<sup>wt</sup></i> | Huazhan     | <i>N<sup>wt</sup>N<sup>stop</sup></i> | 7       |
| Huiliangyou996       | HLY    | 1892s         | <i>p<sup>del</sup>p<sup>wt</sup></i> | R996        | <i>N<sup>wt</sup>N<sup>stop</sup></i> | 10      |
| Huiliangyou -huazhan | HLYH   | Longke638s    | <i>p<sup>del</sup>p<sup>wt</sup></i> | Huazhan     | <i>N<sup>wt</sup>N<sup>stop</sup></i> | 3       |

**S2 Fig.** Summary of sampling of all hybrid varieties.

**(A)** Field display of differences in plant height among hybrid individuals. A few LYP9 F<sub>1</sub>s were significantly taller than others. Two middle photos are taken by Prof. Dacheng Tian with tall progeny

of high recombinant LYP9 individuals (left one) and normal (non-recombinant) LYP9 F<sub>1</sub> individuals (right one).

**(B)** A total of 50 F<sub>1</sub> individuals which presented exceptionally tall statures, were sampled in summer of 2017. Specifically, 26 tall individuals from ~1,100,000 LYP9 individuals with plant height > 130 cm were collected, and among them, 24 samples harboring the wild-type *SD1* gene ( $N^{wt}P^{wt}$ ) (Supplementary table S2) and two samples were determined to be false positives. In the other four crosses, a total of 24 tall individuals with plant height > 150 cm were sampled, and all of them were confirmed to be recombinant lines (Supplementary table S6). \*: Lowercase “s” means sterile line, similarly for other parental lines.
